# Supplementary material for: Diagnosis and Prognosis in Disorders of Consciousness: An Active Paradigm fMRI Study
Source: Hindawi journal article supplement (doi:10.1155/2023/3991087), 2023-11-13
Supplement: f1 [file 3991087.f1.pdf]

## Figure A1: Supplementary Motor Cortex Mask

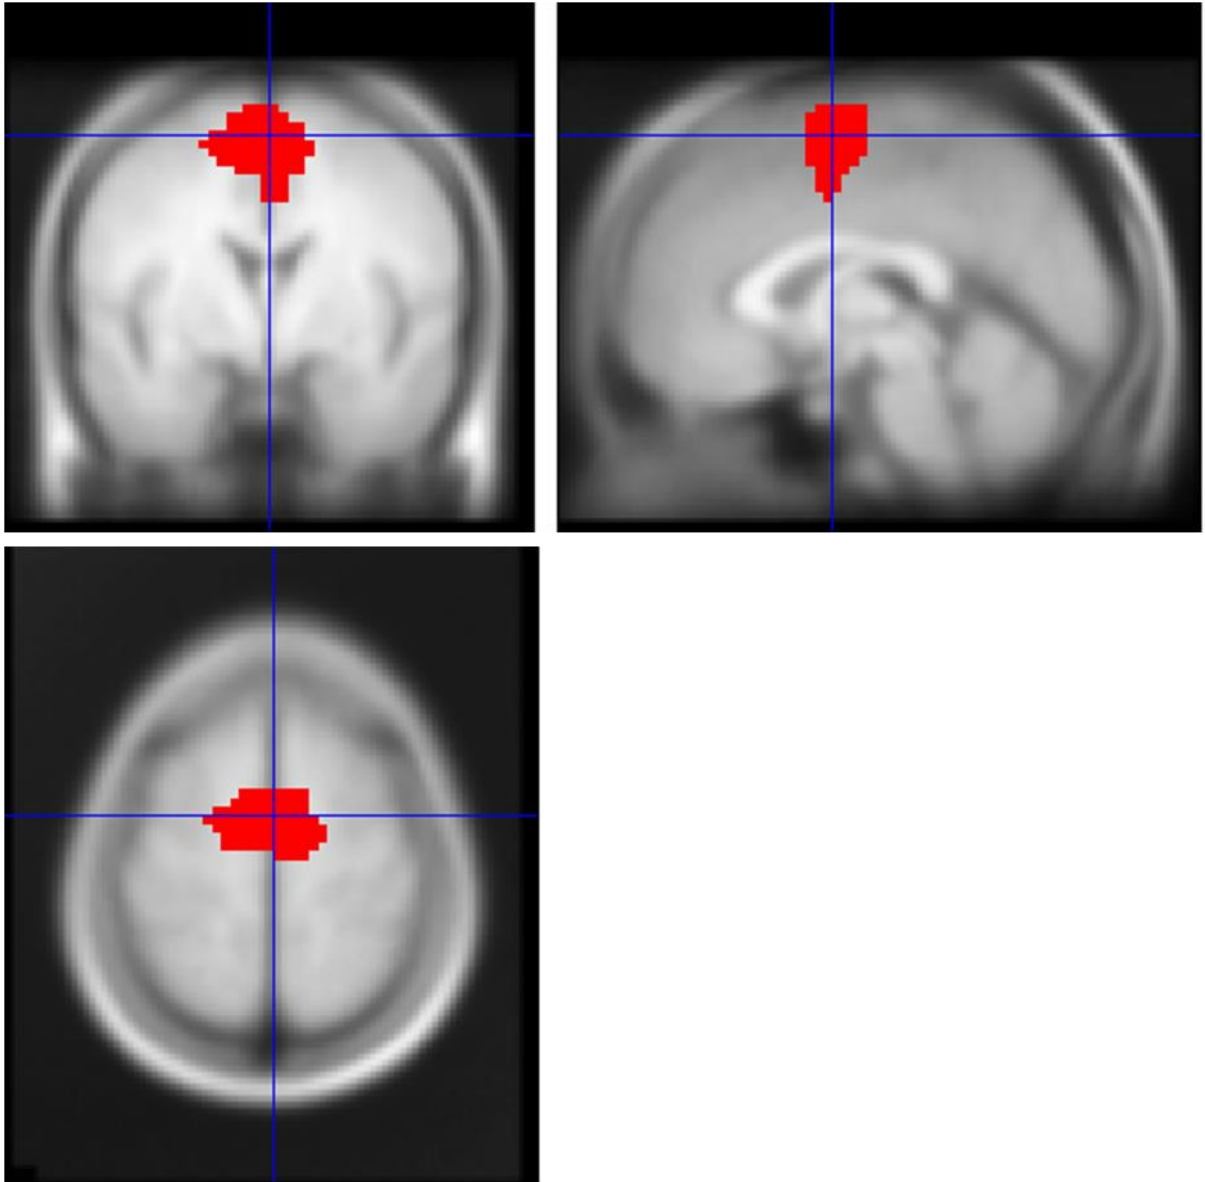

**Figure A1: SMA Mask:** binary mask (red) created with SPM12 corresponding to the SMA (center at 0 -4 57, consisting of 1079 voxels (at a 3x3x3mm resolution=29133mm<sup>3</sup> volume), used for the ROI analysis (ROI=Region of Interest, SMA=Supplementary Motor Cortex, SPM=Statistical Parametric Mapping)

**Table A1: Patients Overview**

| ID  | Sex <sup>a</sup> | Age at DoC onset (in years) | Aetiology <sup>b</sup> | Time of fMRI            |                         | Diagnosis at fMRI | CRS-R score at fMRI <sup>c</sup> | Months until discharge | Diagnosis at discharge | CRS-R score at discharge | Development <sup>d</sup> | SVC Analysis significant <sup>e</sup> | REX Analysis significant <sup>e</sup> | Activity in whole brain |
|-----|------------------|-----------------------------|------------------------|-------------------------|-------------------------|-------------------|----------------------------------|------------------------|------------------------|--------------------------|--------------------------|---------------------------------------|---------------------------------------|-------------------------|
|     |                  |                             |                        | (in months after onset) | (in months after onset) |                   |                                  |                        |                        |                          |                          |                                       |                                       |                         |
| 1   | M                | 35                          | T                      | 61                      | 61                      | MCS               | 8                                | 61                     | MCS                    | 8                        | 0                        | No                                    | No                                    | Yes                     |
| 2   | F                | 29                          | NT                     | 30                      | 30                      | UWS               | 3                                | 30                     | UWS                    | 4                        | 0                        | Yes                                   | Yes                                   | Yes                     |
| 3   | F                | 37                          | T                      | 10                      | 12                      | UWS               | 6                                | 12                     | UWS                    | 5                        | 0                        | No                                    | No                                    | No                      |
| 4   | F                | 54                          | T                      | 19                      | 19                      | MCS               | 8                                | 19                     | MCS                    | 8                        | 0                        | No                                    | No                                    | Yes                     |
| 5   | M                | 66                          | T                      | 2                       | 2                       | UWS               | 5                                | 2                      | UWS                    | 7                        | 0                        | No                                    | No                                    | No                      |
| 6   | M                | 66                          | T                      | 2                       | 8                       | MCS               | 16                               | 8                      | eMCS                   | 22                       | +                        | No                                    | No                                    | Yes                     |
| 7   | F                | 28                          | NT                     | 4                       | 13                      | MCS               | 9                                | 13                     | MCS                    | 9                        | 0                        | No                                    | No                                    | No                      |
| 8   | F                | 63                          | T                      | 2                       | 5                       | MCS               | 6                                | 5                      | MCS                    | 6                        | 0                        | No                                    | No                                    | No                      |
| 9   | M                | 26                          | T                      | 4                       | 9                       | UWS               | 6                                | 9                      | MCS                    | 15                       | +                        | No                                    | No                                    | No                      |
| 10† | F                | 62                          | T                      | 2                       | 5                       | MCS               | 10                               | 5                      | MCS                    | 10                       | 0                        | No                                    | No                                    | No                      |
| 11  | M                | 55                          | NT                     | 1                       | 5                       | MCS               | NA                               | 5                      | eMCS                   | 22                       | +                        | No                                    | No                                    | No                      |
| 12  | M                | 55                          | NT                     | 2                       | 7                       | UWS               | 1                                | 7                      | UWS                    | 1                        | 0                        | No                                    | No                                    | Yes                     |
| 13  | M                | 46                          | NT                     | 1                       | 5                       | MCS               | 9                                | 5                      | MCS                    | 9                        | 0                        | Yes                                   | Yes                                   | Yes                     |
| 14  | M                | 54                          | NT                     | 2                       | 2                       | MCS               | 12                               | 2                      | MCS                    | 12                       | 0                        | Yes                                   | Yes                                   | Yes                     |
| 15  | M                | 65                          | T                      | 2                       | 6                       | MCS               | 10                               | 6                      | eMCS                   | 22                       | +                        | No                                    | No                                    | Yes                     |
| 16  | F                | 35                          | NT                     | 1                       | 14                      | UWS               | 5                                | 14                     | MCS                    | 14                       | +                        | No                                    | No                                    | No                      |
| 17  | M                | 31                          | T                      | 24                      | 3                       | UWS               | 8                                | 3                      | eMCS                   | 22                       | ++                       | No                                    | No                                    | No                      |
| 18† | M                | 52                          | NT                     | 39                      | 7                       | UWS               | 7                                | 39                     | UWS                    | 7                        | 0                        | No                                    | No                                    | No                      |
| 19  | F                | 71                          | NT                     | 0                       | 6                       | MCS               | 10                               | 0                      | UWS                    | 6                        | -                        | No                                    | No                                    | Yes                     |
| 20  | M                | 61                          | NT                     | 2                       | 6                       | MCS               | 8                                | 6                      | eMCS                   | 22                       | +                        | No                                    | Yes                                   | Yes                     |

| ID  | Sex <sup>a</sup> | Age at DoC onset (in years) | Aetiology <sup>b</sup> | Time of fMRI            |      | Diagnosis at fMRI | CRS-R score at fMRI <sup>f</sup> | Months until discharge | Diagnosis at discharge | CRS-R score at discharge | Development <sup>d</sup> | SVC-Analysis significant <sup>e</sup> | REX-Analysis significant <sup>e</sup> | Activity in whole brain |
|-----|------------------|-----------------------------|------------------------|-------------------------|------|-------------------|----------------------------------|------------------------|------------------------|--------------------------|--------------------------|---------------------------------------|---------------------------------------|-------------------------|
|     |                  |                             |                        | (in months after onset) |      |                   |                                  |                        |                        |                          |                          |                                       |                                       |                         |
| 21† | M                | 59                          | NT                     | 0                       | UWS  | 5                 | 1                                | UWS                    | 4                      | 0                        | No                       | No                                    | No                                    | Yes                     |
| 22  | M                | 55                          | NT                     | 0                       | UWS  | 4                 | 0                                | UWS                    | 5                      | 0                        | No                       | No                                    | No                                    | No                      |
| 23  | M                | 73                          | T                      | 0                       | UWS  | 3                 | 1                                | UWS                    | 3                      | 0                        | No                       | No                                    | No                                    | No                      |
| 24  | M                | 60                          | T                      | 0                       | UWS  | 4                 | 2                                | UWS                    | 4                      | 0                        | No                       | No                                    | No                                    | No                      |
| 25  | F                | 65                          | NT                     | 7                       | MCS  | 9                 | 7                                | MCS                    | 9                      | 0                        | No                       | No                                    | No                                    | No                      |
| 26  | F                | 53                          | NT                     | 3                       | MCS  | 11                | 8                                | eMCS                   | 23                     | +                        | No                       | No                                    | No                                    | No                      |
| 27† | M                | 50                          | NT                     | 4                       | MCS  | 8                 | 6                                | MCS                    | 8                      | 0                        | No                       | No                                    | No                                    | No                      |
| 28  | F                | 41                          | NT                     | 0                       | eMCS | 18                | 1                                | eMCS                   | 20                     | 0                        | Yes                      | Yes                                   | Yes                                   | Yes                     |
| 29  | F                | 71                          | NT                     | 3                       | MCS  | 7                 | 3                                | MCS                    | 7                      | 0                        | No                       | No                                    | No                                    | No                      |
| 30  | M                | 64                          | NT                     | 2                       | UWS  | 6                 | 3                                | UWS                    | 5                      | 0                        | No                       | No                                    | No                                    | No                      |
| 31  | M                | 51                          | NT                     | 3                       | MCS  | 7                 | 8                                | UWS                    | 3                      | -                        | No                       | No                                    | No                                    | Yes                     |
| 32  | M                | 43                          | NT                     | 3                       | UWS  | 5                 | 12                               | UWS                    | 5                      | 0                        | No                       | No                                    | No                                    | No                      |
| 33† | M                | 43                          | T                      | 2                       | MCS  | 20                | 8                                | MCS                    | 12                     | 0                        | No                       | No                                    | No                                    | No                      |
| 34† | F                | 31                          | NT                     | 1                       | MCS  | 9                 | 6                                | eMCS                   | 23                     | +                        | No                       | No                                    | No                                    | No                      |
| 35  | M                | 52                          | NT                     | 2                       | UWS  | 6                 | 3                                | UWS                    | 7                      | 0                        | No                       | No                                    | No                                    | No                      |
| 36† | M                | 33                          | NT                     | 2                       | MCS  | 10                | 13                               | eMCS                   | 20                     | +                        | No                       | No                                    | No                                    | No                      |
| 37  | M                | 53                          | NT                     | 1                       | eMCS | 22                | 3                                | eMCS                   | 22                     | 0                        | Yes                      | Yes                                   | Yes                                   | Yes                     |
| 38  | M                | 82                          | NT                     | 0                       | UWS  | 4                 | 1                                | UWS                    | 3                      | 0                        | No                       | No                                    | No                                    | No                      |
| 39† | M                | 68                          | NT                     | 1                       | UWS  | 3                 | 3                                | UWS                    | 6                      | 0                        | No                       | No                                    | No                                    | No                      |
| 40  | M                | 29                          | T                      | 10                      | UWS  | 5                 | 12                               | UWS                    | 5                      | 0                        | No                       | No                                    | No                                    | No                      |

| ID  | Sex <sup>a</sup> | Age at DoC onset (in years) | Aetiology <sup>b</sup> | Time of fMRI (in months after onset) | Diagnosis at fMRI | CRS-R score at fMRI <sup>c</sup> | Months until discharge | Diagnosis at discharge | CRS-R score at discharge | Development <sup>d</sup> | SVC Analysis significant <sup>e</sup> | REX Analysis significant <sup>e</sup> | Activity in whole brain |
|-----|------------------|-----------------------------|------------------------|--------------------------------------|-------------------|----------------------------------|------------------------|------------------------|--------------------------|--------------------------|---------------------------------------|---------------------------------------|-------------------------|
|     |                  |                             |                        |                                      |                   |                                  |                        |                        |                          |                          |                                       |                                       |                         |
| 41  | M                | 18                          | NT                     | 1                                    | UWS               | 4                                | 6                      | UWS                    | 7                        | 0                        | No                                    | No                                    | Yes                     |
| 42  | F                | 17                          | NT                     | 8                                    | UWS               | 5                                | 10                     | UWS                    | 4                        | 0                        | No                                    | No                                    | No                      |
| 43  | M                | 85                          | T                      | 2                                    | UWS               | 6                                | 2                      | MCS                    | 7                        | +                        | No                                    | Yes                                   | No                      |
| 44† | M                | 17                          | NT                     | 4                                    | UWS               | 5                                | 6                      | UWS                    | 4                        | 0                        | No                                    | No                                    | No                      |
| 45† | M                | 15                          | T                      | 33                                   | MCS               | 8                                | 34                     | MCS                    | 8                        | 0                        | No                                    | No                                    | Yes                     |
| 46† | M                | 35                          | NT                     | 1                                    | eMCS              | 18                               | 1                      | eMCS                   | 19                       | 0                        | Yes                                   | Yes                                   | Yes                     |
| 47  | M                | 33                          | NT                     | 2                                    | UWS               | 6                                | 3                      | UWS                    | 5                        | 0                        | No                                    | No                                    | No                      |
| 48† | F                | 48                          | T                      | 1                                    | UWS               | 3                                | 5                      | UWS                    | 3                        | 0                        | No                                    | No                                    | No                      |
| 49  | M                | 66                          | T                      | 1                                    | UWS               | 4                                | 5                      | UWS                    | 4                        | 0                        | No                                    | No                                    | Yes                     |
| 50  | M                | 49                          | NT                     | 3                                    | MCS               | 12                               | 5                      | MCS                    | 12                       | 0                        | No                                    | No                                    | No                      |
| 51  | M                | 47                          | NT                     | 3                                    | UWS               | 5                                | 3                      | UWS                    | 4                        | 0                        | No                                    | No                                    | Yes                     |
| 52  | F                | 36                          | NT                     | 24                                   | MCS               | 8                                | 25                     | MCS                    | 8                        | 0                        | No                                    | Yes                                   | Yes                     |
| 53  | M                | 23                          | T                      | 2                                    | UWS               | 7                                | 1                      | eMCS                   | 23                       | ++                       | No                                    | No                                    | No                      |
| 54  | F                | 58                          | NT                     | 26                                   | MCS               | 9                                | 26                     | MCS                    | 9                        | 0                        | Yes                                   | Yes                                   | Yes                     |
| 55  | M                | 61                          | NT                     | 3                                    | MCS               | 10                               | 11                     | MCS                    | 9                        | 0                        | No                                    | No                                    | Yes                     |
| 56  | F                | 57                          | NT                     | 2                                    | MCS               | 13                               | 4                      | MCS                    | 14                       | 0                        | No                                    | No                                    | Yes                     |
| 57  | F                | 19                          | T                      | 264                                  | UWS               | 5                                | 264                    | UWS                    | 5                        | 0                        | No                                    | No                                    | Yes                     |
| 58  | F                | 25                          | NT                     | 2                                    | MCS               | 11                               | 3                      | MCS                    | 12                       | 0                        | Yes                                   | Yes                                   | Yes                     |
| 59† | M                | 46                          | NT                     | 2                                    | MCS               | 9                                | 5                      | UWS                    | 6                        | -                        | No                                    | No                                    | No                      |
| 60  | M                | 55                          | T                      | 1                                    | UWS               | 5                                | 7                      | MCS                    | 12                       | +                        | No                                    | No                                    | Yes                     |

| ID        | Sex <sup>a</sup> | Age at DoC onset (in years) | Aetiology <sup>b</sup> | Time of fMRI            |     | Diagnosis at fMRI | CRS-R score at fMRI <sup>c</sup> | Months until discharge | Diagnosis at discharge | CRS-R score at discharge | Development <sup>d</sup> | SVC Analysis significant <sup>e</sup> | REX Analysis significant <sup>e</sup> | Activity in whole brain |
|-----------|------------------|-----------------------------|------------------------|-------------------------|-----|-------------------|----------------------------------|------------------------|------------------------|--------------------------|--------------------------|---------------------------------------|---------------------------------------|-------------------------|
|           |                  |                             |                        | (in months after onset) |     |                   |                                  |                        |                        |                          |                          |                                       |                                       |                         |
| <b>61</b> | F                | 27                          | NT                     | 240                     | UWS | 7                 | 241                              | UWS                    | 7                      | 0                        | No                       | No                                    | No                                    | No                      |
| <b>62</b> | F                | 49                          | NT                     | 31                      | MCS | 8                 | 32                               | MCS                    | 8                      | 0                        | No                       | No                                    | No                                    | No                      |
| <b>63</b> | F                | 70                          | NT                     | 3                       | UWS | 5                 | 3                                | UWS                    | 5                      | 0                        | No                       | No                                    | No                                    | Yes                     |
| <b>64</b> | M                | 29                          | T                      | 8                       | MCS | 9                 | 9                                | MCS                    | 9                      | 0                        | No                       | No                                    | No                                    | Yes                     |
| <b>65</b> | F                | 47                          | NT                     | 4                       | MCS | 9                 | 12                               | MCS                    | 20                     | 0                        | Yes                      | Yes                                   | Yes                                   | Yes                     |
| <b>66</b> | M                | 65                          | T                      | 2                       | UWS | 2                 | 2                                | UWS                    | 3                      | 0                        | No                       | No                                    | No                                    | No                      |
| <b>67</b> | M                | 68                          | NT                     | 1                       | UWS | 3                 | 2                                | UWS                    | 3                      | 0                        | No                       | No                                    | No                                    | No                      |
| <b>68</b> | M                | 60                          | NT                     | 2                       | UWS | 4                 | 2                                | UWS                    | 1                      | 0                        | No                       | No                                    | No                                    | No                      |
| <b>69</b> | M                | 45                          | NT                     | 3                       | MCS | 13                | 4                                | MCS                    | 10                     | 0                        | No                       | No                                    | No                                    | No                      |
| <b>70</b> | M                | 45                          | NT                     | 3                       | MCS | 7                 | 3                                | UWS                    | 6                      | -                        | No                       | No                                    | No                                    | No                      |
| <b>71</b> | F                | 40                          | NT                     | 3                       | MCS | 7                 | 9                                | eMCS                   | 22                     | +                        | No                       | No                                    | No                                    | Yes                     |
| <b>72</b> | M                | 46                          | NT                     | 5                       | MCS | 8                 | 8                                | MCS                    | 8                      | 0                        | Yes                      | Yes                                   | Yes                                   | Yes                     |
| <b>73</b> | M                | 56                          | T                      | 6                       | UWS | 4                 | 7                                | UWS                    | 6                      | 0                        | No                       | No                                    | No                                    | No                      |

*Table A1.* Descriptive data for each patient that participated in the study. The symbol † indicates patients who were already deceased at the time of the study.

<sup>a</sup> F = Female; M = Male

<sup>b</sup> NT = Non-traumatic; T = Traumatic

<sup>c</sup> Refers to the CRS-R score given within the week of the fMRI examination; NA = Respective CRS-R score is not available

<sup>d</sup> 0 = no improvement; + = improved to the next higher clinical state; ++ = improved by two clinical states; - = worsened by one clinical state

<sup>e</sup> results are reported for the one-tailed analyses
